# Supplementary material for: Drug Utilization and Measurement of Medication Adherence: A Real World Study of Psoriasis in Italy
Source: MDPI journal article supplement (doi:10.3390/pharmaceutics15122647), 2023-11-21

## Supplementary Material

**Figure S1.** Schematic presentation of PSO patients' selection

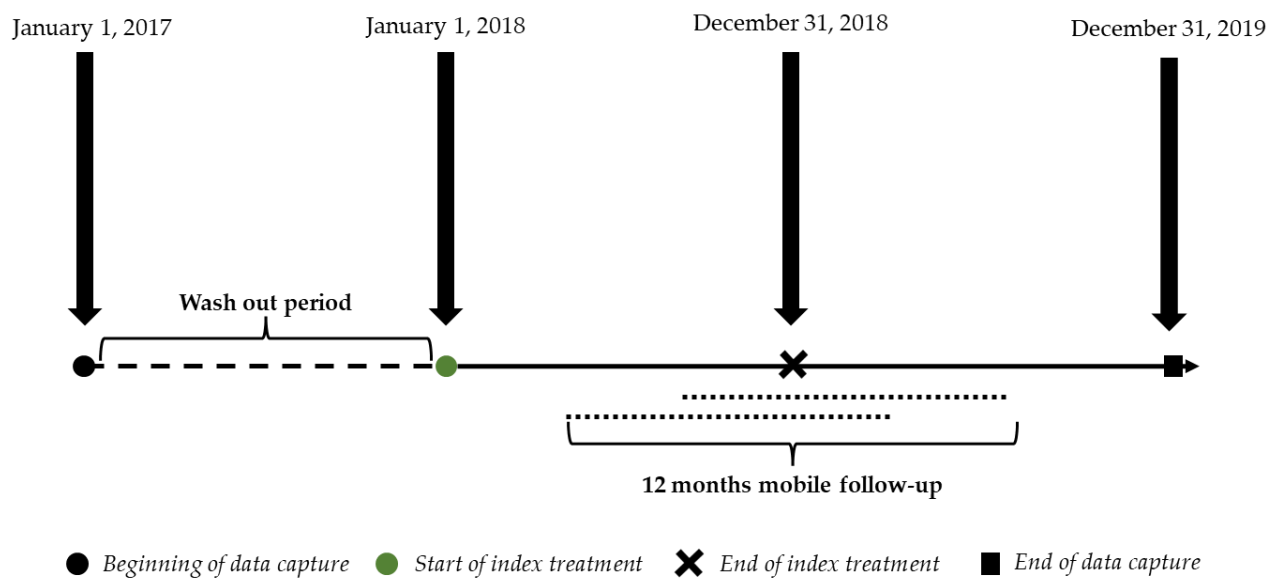

**Figure S2. Study flowchart**

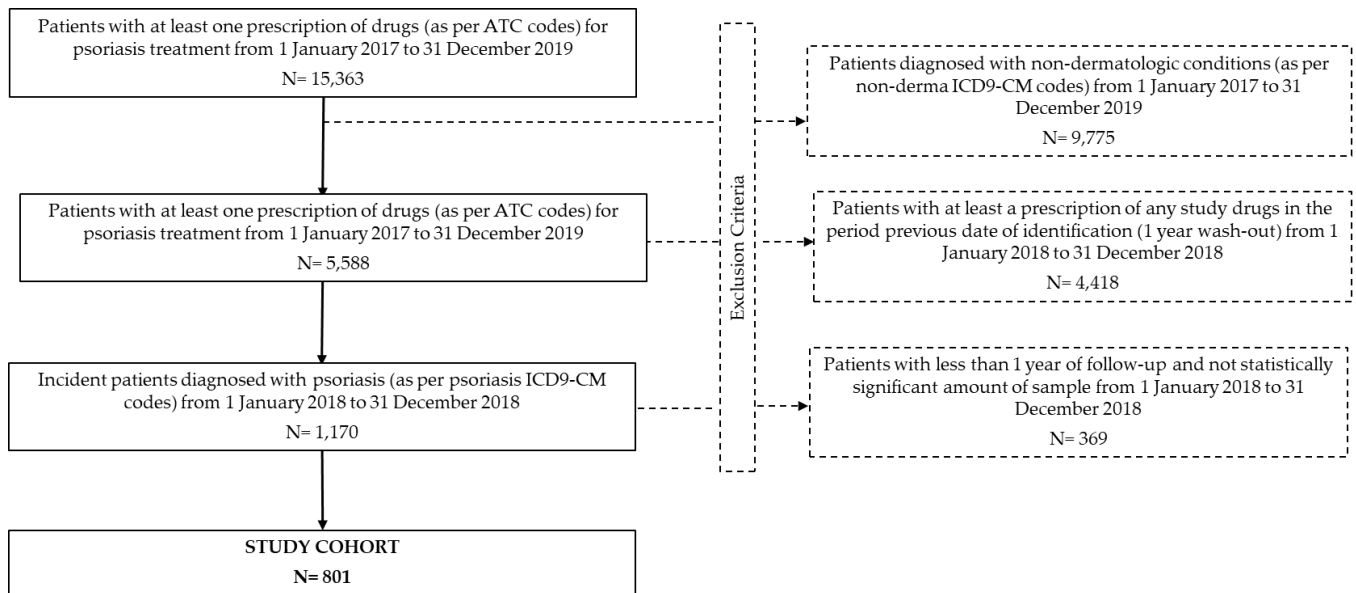

**Table S1.** Overview of study drugs charateristics

| ATC                    | Active Substance | Trade Name | Posology           | Drug speciality code | Year of Marketing Authorisation | Therapeutic Indications                                                                                                                        | Reimbursability | Ex Factory Price | Additional Monitoring |  |  |  |
|------------------------|------------------|------------|--------------------|----------------------|---------------------------------|------------------------------------------------------------------------------------------------------------------------------------------------|-----------------|------------------|-----------------------|--|--|--|
| D05 Antipsoriatics     |                  |            |                    |                      |                                 |                                                                                                                                                |                 |                  |                       |  |  |  |
| D05BB02                | Acitretin        | Neotigason | 25 mg/20 tablets   | 027480021            | 26/04/1997                      | Severe forms of psoriasis, pustular psoriasis,Severe and refractory forms of dermatitis, Darier's disease lichen planus                        | A               | 19,83 €          | Additional Monitoring |  |  |  |
|                        |                  |            | 10 mg/30 tablets   | 027480019            |                                 |                                                                                                                                                | A               | 14,11 €          | Additional Monitoring |  |  |  |
|                        |                  | Zorias     | 25 mg/20 tablets   | 041619065            | feb-13                          |                                                                                                                                                | A               | 12,73 €          | Additional Monitoring |  |  |  |
|                        |                  |            | 10 mg/30 tablets s | 041619014            |                                 |                                                                                                                                                | A               | 9,06 €           | Additional Monitoring |  |  |  |
|                        |                  |            |                    |                      |                                 |                                                                                                                                                |                 |                  |                       |  |  |  |
|                        |                  |            |                    |                      |                                 |                                                                                                                                                |                 |                  |                       |  |  |  |
| L04 Immunosuppressants |                  |            |                    |                      |                                 |                                                                                                                                                |                 |                  |                       |  |  |  |
| L04AD01                | Cyclosporine     | Ciqorin    | 100 mg/ 30 tablets | 042787299            | -                               | Organ transplantation, Bone marrow transplantation, Endogenous uveitis, Nephrotic syndrome, Rheumatoid arthritis, Psoriasis, Atopic dermatitis | A               | € 29,52          | -                     |  |  |  |
|                        |                  |            | 10mg/ 50 tablets   | 042787251            |                                 |                                                                                                                                                | A               | € 5,42           | -                     |  |  |  |
|                        |                  |            | 25mg/ 50 tablets   | 042787263            |                                 |                                                                                                                                                | A               | € 13,55          | -                     |  |  |  |
|                        |                  |            | 50mg/ 50 tablets   | 042787275            |                                 |                                                                                                                                                | A               | € 26,27          | -                     |  |  |  |
|                        |                  |            |                    |                      |                                 |                                                                                                                                                |                 |                  |                       |  |  |  |
|                        |                  |            |                    |                      |                                 |                                                                                                                                                |                 |                  |                       |  |  |  |
| L04AX03                | Methotrexato     | Reumaflex  | 10mg/ 0,2 ml       | 039153123            | 29/12/2009                      | Rheumatoid arthritis, Juvenile idiopathic arthritis, Severe psoriasis, Crohn's disease                                                         | A               | € 17,85          | -                     |  |  |  |
|                        |                  |            | 12,5mg/0,25ml      | 039153628            |                                 |                                                                                                                                                | A               | € 18,20          | -                     |  |  |  |
|                        |                  |            | 15mg/0,30ml        | 039153224            | 29/12/2009                      |                                                                                                                                                | A               | € 26,07          | -                     |  |  |  |
|                        |                  |            | 17,5mg/0,35ml      | 039153679            |                                 |                                                                                                                                                | A               | € 25,09          | -                     |  |  |  |
|                        |                  |            | 20mg/0,40ml        | 039153325            |                                 |                                                                                                                                                | A               | € 34,48          | -                     |  |  |  |
|                        |                  |            | 25mg/0,50ml        | 039153426            |                                 |                                                                                                                                                | A               | € 42,34          | -                     |  |  |  |
|                        |                  |            |                    |                      |                                 |                                                                                                                                                |                 |                  |                       |  |  |  |

|         |                  |            |                                                  |           |            |                                                                                                                                                        |   |               |                                            |
|---------|------------------|------------|--------------------------------------------------|-----------|------------|--------------------------------------------------------------------------------------------------------------------------------------------------------|---|---------------|--------------------------------------------|
| L04AX07 | Dimethylfumarate | Skilarence | 30 mg/42<br>tablets                              | 045493018 | 23/06/2017 | Psoriasis plaques                                                                                                                                      | A | 94,16 €       | -                                          |
|         |                  |            | 120 mg/ 90<br>tablets                            | 045493044 |            |                                                                                                                                                        | A | 201,78 €      | -                                          |
| L04AA29 | Tofacitinib      | Xeljanz    | 50mg/56 tables                                   | 045320037 | 22/03/2017 | Rheumatoid arthritis, Psoriatic arthritis, Ankylosing spondylitis,<br>Ulcerative colitis, Juvenile idiopathic arthritis                                | H | 720,92 €      | AIFA Note 06/07/2021                       |
|         |                  |            | 50mg/182<br>tablets                              | 045320049 |            |                                                                                                                                                        | H | 2.342,83<br>€ |                                            |
|         |                  |            | 50mg/112<br>tablets                              | 045320102 |            |                                                                                                                                                        | H | 1.441,83<br>€ |                                            |
|         |                  |            | 10mg/112<br>tablets                              | 045320088 |            |                                                                                                                                                        | H | 2.883,67<br>€ |                                            |
|         |                  |            | 30mg/56 tablets                                  | 043867023 |            |                                                                                                                                                        | A | 758,10 €      |                                            |
|         |                  |            | 4 x 10 mg + 4 x<br>20 mg + 19 x 30<br>mg tablets | 043867011 |            |                                                                                                                                                        | A | 365,51 €      |                                            |
| L04AA32 | Apremilast       | Otezla     | 25mg/0,51ml<br>4syringes                         | 044691057 | 15/01/2015 | Psoriatic arthritis, Psoriasis, Behçet's disease                                                                                                       | H | 314,07 €      | Additional Monitoring –<br>AIFA paper form |
|         |                  |            | 50mg/1ml 4<br>syringes                           | 044691018 |            |                                                                                                                                                        | H | 629,00 €      |                                            |
|         |                  |            | 50mg/4<br>syringes                               | 044691020 |            |                                                                                                                                                        | H | 629,00 €      |                                            |
|         |                  | Benepali   | 25mg/0,5ml 4<br>syringes                         | 045451034 | 23/06/2017 | Rheumatoid arthritis, Juvenile idiopathic arthritis, Psoriatic<br>arthritis, Axial spondyloarthritis, Plaque psoriasis, Paediatric<br>plaque psoriasis | H | 299,34 €      | Additional Monitoring –<br>AIFA paper form |
|         |                  |            | 50mg/1ml 4<br>syringes                           | 045451073 |            |                                                                                                                                                        | H | 598,66 €      |                                            |
|         |                  |            | 50mg/1ml 4<br>pens                               | 045451111 |            |                                                                                                                                                        | H | 598,66 €      |                                            |
| L04AB01 | Etanercept       | Enbrel     | 10 mg 1 vial                                     | 034675215 | 03/02/2000 |                                                                                                                                                        | H | 184,21 €      | AIFA paper form                            |
|         |                  |            | 25 mg 4<br>syringes                              | 034675102 |            |                                                                                                                                                        | H | 460,51 €      |                                            |

|         |            |                   |                       |           |            |   |            |                                         |
|---------|------------|-------------------|-----------------------|-----------|------------|---|------------|-----------------------------------------|
|         |            | 50 mg 1 ml 4 pens | 034675191             |           |            | H | 921,08 €   |                                         |
|         |            | 25 mg 4 syringes  | 034675037             |           |            | H | 460,51 €   |                                         |
|         |            | 50 mg 4 syringes  | 034675140             |           |            | H | 921,02 €   |                                         |
| L04AB02 | Infliximab | <b>Remicade</b>   | 100mg 1 vial          | 034528012 | 13/08/1999 | H | 463,53 €   | AIFA paper form - AIFA note 07/03/2022  |
|         |            | <b>Zessly</b>     | 100mg 1 vial          | 046635013 | 18/05/2018 | H | 386,28 €   | Additional Monitoring –                 |
|         |            | <b>Flixabi</b>    | 100mg 1 vial          | 044892014 | 26/05/2016 | H | 386,28 €   |                                         |
|         |            | <b>Inflectra</b>  | 100mg 1 vial          | 043010014 | 10/09/2013 | H | 386,28 €   | AIFA Note 07/03/2022                    |
| L04AB02 | Infliximab |                   | 100mg 1 vial          | 042942019 |            | H | 386,28 €   |                                         |
|         |            | <b>Remsima</b>    | 120mg/ml 1 pen        | 042942122 | 22/11/2019 | H | 288,98 €   | AIFA paper form - AIFA note 07/03/2022  |
|         |            |                   | 120mg/ml 4 pens       | 042942146 |            | H | 1.155,94 € |                                         |
|         |            |                   |                       |           |            |   |            |                                         |
| L04AB04 | Adalimumab |                   | 20mg/0,4ml 1 syringe  | 045317017 |            | H | 192,87 €   |                                         |
|         |            | <b>Amgevita</b>   | 40mg/0,8ml 2 pens     | 045317070 | 22/03/2017 | H | 771,50 €   | AIFA paper form                         |
|         |            |                   | 40mg/0,8ml 2 syringes | 045317031 |            | H | 771,50 €   |                                         |
|         |            |                   |                       |           |            |   |            |                                         |
|         |            | <b>Humira</b>     | 80mg/0,8ml 1 pen      | 035946209 | 08/09/2003 | H | 964,37 €   | AIFA paper form                         |
|         |            |                   | 80mg/0,8ml 1 syringe  | 035946197 |            | H | 964,37 €   |                                         |
|         |            |                   | 40mg/0,4ml 2 pens     | 035946161 |            | H | 964,37 €   |                                         |
|         |            |                   |                       |           |            |   |            |                                         |
|         |            | <b>Idacio</b>     | 40mg/0,8ml 1vial      | 047805015 | 02/04/2019 | H | 342,45 €   | Additional Monitoring – AIFA paper form |

|         |                           |           |            |  |                                                                                                                  |   |            |                         |                                            |
|---------|---------------------------|-----------|------------|--|------------------------------------------------------------------------------------------------------------------|---|------------|-------------------------|--------------------------------------------|
|         | 40mg/0,8ml<br>2pens       | 047805039 |            |  |                                                                                                                  | H | 684,71 €   |                         |                                            |
|         |                           |           |            |  |                                                                                                                  |   |            |                         |                                            |
|         | 40mg/0,8ml 2<br>syringes  | 047805027 |            |  |                                                                                                                  | H | 684,71 €   |                         |                                            |
| Yuflyma | 40mg/0,4ml 1<br>pen       | 049376092 | 11/02/2021 |  |                                                                                                                  | H | 342,35 €   | Additional Monitoring – |                                            |
|         | 40mg/ 0,4ml 4<br>pens     | 049376116 |            |  |                                                                                                                  | H | 1.369,42 € | AIFA paper form         |                                            |
|         |                           |           |            |  |                                                                                                                  |   |            |                         |                                            |
| Hyrimoz | 40mg/0,8ml 2<br>pens      | 046889059 | 26/07/2018 |  |                                                                                                                  | H | 684,71 €   |                         |                                            |
|         | 20mg/04ml 2<br>syringes   | 046889073 |            |  |                                                                                                                  | H | 342,35 €   |                         | Additional Monitoring –<br>AIFA paper form |
|         | 40mg/0,8ml 2<br>pens      | 046889022 |            |  |                                                                                                                  | H | 684,71 €   |                         |                                            |
| Imraldi | 40mg/0,8ml 2<br>pens      | 045616063 | 24/08/2017 |  | Rheumatoid arthritis, Axial spondyloarthritis, Ankylosing<br>spondylitis, Psoriasis plaques, Psoriatic arthritis | H | 684,71 €   | Additional Monitoring – |                                            |
|         | 40mg/0,8ml 2<br>syringes  | 045616024 |            |  |                                                                                                                  | H | 684,71 €   | AIFA paper form         |                                            |
|         |                           |           |            |  |                                                                                                                  |   |            |                         |                                            |
| Cimzia  | 200mg/ml 1<br>syringe     | 039539085 | 01/10/2009 |  |                                                                                                                  | H | 920,55 €   |                         |                                            |
|         | 200mg/ml 2<br>pens        | 039539059 |            |  |                                                                                                                  | H | 920,55 €   |                         | AIFA paper form                            |
|         | 200mg/ml 2<br>siringhe    | 039539010 |            |  |                                                                                                                  | H | 920,55 €   |                         |                                            |
| Stelara | 130 mg 26 ml 1<br>vial    | 038936050 | 16/01/2009 |  | Psoriasis plaques, Psoriatic arthritis, Crohn's disease, Ulcerative<br>colitis                                   | H | 2.842,88 € |                         |                                            |
|         | 45 mg/0,5 ml 1<br>syringe | 038936035 |            |  |                                                                                                                  | H | 2.842,88 € |                         | AIFA paper form                            |
|         | 90 mg/ml 1<br>syringe     | 038936047 |            |  |                                                                                                                  | H | 2.842,88 € |                         |                                            |

|         |               |          |                                   |           |            |                                                                                                                                      |   |               |                                            |
|---------|---------------|----------|-----------------------------------|-----------|------------|--------------------------------------------------------------------------------------------------------------------------------------|---|---------------|--------------------------------------------|
|         |               |          | 45 mg/0,5 ml 1<br>vial            | 038936011 |            |                                                                                                                                      | H | 2.842,88<br>€ |                                            |
|         |               |          | 150 mg/ml 1<br>pen                | 043873049 |            |                                                                                                                                      | H | 473,81 €      |                                            |
|         |               |          | 300 mg/2 ml<br>pens               | 043873102 |            |                                                                                                                                      | H | 947,63 €      |                                            |
|         |               |          | 150 mg/ ml 1<br>syringe           | 043873025 |            |                                                                                                                                      | H | 473,81 €      |                                            |
| L04AC10 | Secukinumab   | Cosentyx | 300 mg/2 ml                       |           | 15/01/2015 | Plaque psoriasis in paediatric patients juvenile idiopathic arthritis, Arthritis related to enthesitis, Juvenile psoriatic arthritis |   |               | AIFA paper form                            |
|         |               |          | 150 mg/ml 1<br>syringe            | 043873088 |            |                                                                                                                                      | H | 947,63 €      |                                            |
|         |               |          | 150 mg/ ml 2<br>pens              | 043873052 |            |                                                                                                                                      | H | 947,63 €      |                                            |
|         |               |          | 150 mg/ ml 2<br>syringes          | 043873037 |            |                                                                                                                                      | H | 947,63 €      |                                            |
| L04AC12 | Brodalumab    | Kyntheum | 1,5 ml 140<br>mg/ml 2<br>syringes | 045484019 | 17/07/2017 | Psoriasis plaques                                                                                                                    | H | 1.105,36<br>€ | Additional Monitoring –<br>AIFA paper form |
| L04AC13 | Ixekizumab    | Taltz    | 80/ ml mg 2<br>pens               | 044863025 | 25/04/2016 | Psoriasis plaques, Paediatric plaque psoriasis, Psoriatic arthritis,                                                                 | H | 2.025,40<br>€ | -                                          |
|         |               |          | 80/ ml mg 2<br>syringes           | 044863052 |            | Axial spondylarthritis                                                                                                               | H | 2.025,40<br>€ |                                            |
| L04AC16 | Guselkumab    | Tremfya  | 100 mg/ml 1 ml<br>1 pen           | 045772023 | 10/11/2017 | Psoriatic arthritis, Psoriasis plaques                                                                                               | H | 2.062,98<br>€ | Additional Monitoring –                    |
|         |               |          | 100 mg/ml 1 ml<br>1 syringe       | 045772011 |            |                                                                                                                                      | H | 2.062,98<br>€ | AIFA paper form                            |
| L04AC17 | Tildrakizumab | Ilumetri | 100mg/ml                          | 047196011 | 17/09/2018 | Psoriasis plaques                                                                                                                    | H | 3.118,45<br>€ | Additional Monitoring –<br>AIFA paper form |
| L04AC18 | Risankizumab  | Skyrizi  | 75 mg/0,83 ml                     | 047821018 | 26/04/2019 | Psoriatic arthritis, Psoriasis plaques                                                                                               | H | 3.230,00<br>€ | Additional Monitoring –<br>AIFA paper form |

|         |                 |         |          |           |   |                                        |                            |   |                                            |
|---------|-----------------|---------|----------|-----------|---|----------------------------------------|----------------------------|---|--------------------------------------------|
| L04AA56 | Deucravacitinib | -       | -        | -         | - | Psoriatic arthritis, Psoriasis plaques | Not commercially available | - | -                                          |
| L04AC21 | Bimekizumab     | Bimzelx | 160mg/ml | -         | - | Psoriasis plaques                      | CNN                        | - | Additional Monitoring –<br>AIFA paper form |
| L04AC21 | Spesolimab      | Spevigo | 450 mg   | 050464015 | - | Psoriasis pustularis                   | CNN                        | - | -                                          |

Abbreviations: A: essential drugs and those for chronic diseases, fully reimbursed by the National Health Service (NHS); H: drugs for hospital use only that can be used only in hospitals and/or provided in the context of hospitals and assimilated facilities; CNN: band c, non-negotiated; Aifa notes: regulatory instrument that defines the therapeutic indications for which a particular drug is reimbursable under the NHS; Additional Monitoring: Medicines subject to close and specific monitoring by regulatory agencies.



**Table S2.** Description of induction and maintenance phases of PSO pharmacology therapy

| ATC V   | Active Substance       | Drug speciality | Drug speciality Description | Package Days | Induction Posology Description                                                                                                                                                           | Maintenance Posology Description                                         |
|---------|------------------------|-----------------|-----------------------------|--------------|------------------------------------------------------------------------------------------------------------------------------------------------------------------------------------------|--------------------------------------------------------------------------|
| L04AA32 | Apremilast             | 043867011       | 4cpr x 10mg                 | 14           | 1 tablet 10mg daily 1, 2 tablets 10mg daily 2, 1 tablet 10mg and 1 tablet 20mg daily 3, 2 tablets 20mg daily 4, 1 tablet 20mg and 1 tablet 30mg daily 5, 2 tablets 30mg daily for 9 days | -                                                                        |
|         |                        |                 | 4cpr x 20mg                 |              |                                                                                                                                                                                          |                                                                          |
|         |                        |                 | 19cpr x 30mg tablets        |              |                                                                                                                                                                                          |                                                                          |
|         |                        |                 |                             |              |                                                                                                                                                                                          |                                                                          |
|         |                        |                 |                             |              |                                                                                                                                                                                          |                                                                          |
|         |                        | 043867023       | 30 mg 56 tablets            | -            | -                                                                                                                                                                                        | 2 tablets every day for as long as the Therapeutic Plan is valid         |
|         |                        | 04675052        | 50mg/1ml                    | 14           | 2 x 50mg syringes every 7 days for 84 days                                                                                                                                               | 1 x 50 mg syringe every 7 days for as long as the Therapeutic Plan lasts |
|         |                        |                 | 4 syringes                  |              |                                                                                                                                                                                          |                                                                          |
|         |                        | 034675013       | 50mg/1ml                    | 14           | 2 x 50mg syringes every 7 days for 84 days                                                                                                                                               | 1 x 50 mg syringe every 7 days for as long as the Therapeutic Plan lasts |
|         |                        |                 | 4 syringes                  |              |                                                                                                                                                                                          |                                                                          |
| L04AB01 | Etanercept             | 034675037       | 25mg/1ml                    | 7            | 2 x 50mg syringes every 7 days for 84 days                                                                                                                                               | 1 x 50 mg syringe every 7 days for as long as the Therapeutic Plan lasts |
|         |                        |                 | 4 syringes                  |              |                                                                                                                                                                                          |                                                                          |
|         |                        | 034675102       | 25mg/0,5ml                  | 7            | 2 x 50mg syringes every 7 days for 84 days                                                                                                                                               | 1 x 50 mg syringe every 7 days for as long as the Therapeutic Plan lasts |
|         |                        |                 | 4 syringes                  |              |                                                                                                                                                                                          |                                                                          |
|         |                        | 034675140       | 50mg/1ml                    | 14           | 2 x 50mg syringes every 7 days for 84 days                                                                                                                                               | 1 x 50 mg syringe every 7 days for as long as the Therapeutic Plan lasts |
|         |                        |                 | 4 syringes                  |              |                                                                                                                                                                                          |                                                                          |
|         |                        | 034675191       | 50mg/1ml                    | 14           | 2 pens of 50mg every 7 days for 84 days                                                                                                                                                  | 1 pen of 50 mg every 7 days for as long as the Therapeutic Plan lasts    |
|         |                        |                 | 4 pens                      |              |                                                                                                                                                                                          |                                                                          |
|         |                        | 044691020       | 50mg/1ml                    | 14           | 2 pens of 50mg every 7 days for 84 days                                                                                                                                                  | 1 pen of 50 mg every 7 days for as long as the Therapeutic Plan lasts    |
|         |                        |                 | 4 pens                      |              |                                                                                                                                                                                          |                                                                          |
|         | Etanercept Biosimilare | 044691018       | 50mg/1ml                    | 14           | 2 x 50mg syringes every 7 days for 84 days                                                                                                                                               | 1 x 50 mg syringe every 7 days for as long as the Therapeutic Plan lasts |
|         |                        |                 | 4 syringes                  |              |                                                                                                                                                                                          |                                                                          |
|         |                        | 044691057       | 50mg/1ml                    | 14           | 2 x 50mg syringes every 7 days for 84 days                                                                                                                                               | 1 x 50 mg syringe every 7 days for as long as the Therapeutic Plan lasts |
|         |                        |                 | 4 syringes                  |              |                                                                                                                                                                                          |                                                                          |

|         |                        |           |                          |    |                                                                  |                                                                      |
|---------|------------------------|-----------|--------------------------|----|------------------------------------------------------------------|----------------------------------------------------------------------|
| L04AB04 | Adalimumab             | 035946019 | 40mg/0,8ml<br>2 syringes | 11 | 2 syringes of 40mg on the first day and 1<br>syringe after 7 day | 1 syringe every 14 days for as long as the Therapeutic Plan is valid |
|         |                        | 035946209 | 80mg/0,8ml<br>1 pen      | 7  | 2 pens of 40mg on the first day and 1<br>pen after 7 day         | 1 pen every 14 days for as long as the Therapeutic Plan is valid     |
|         |                        | 035946033 | 40mg/0,8ml<br>2 syringes | 11 | 2 syringes of 40mg on the first day and 1<br>syringe after 7 day | 1 syringe every 14 days for as long as the Therapeutic Plan is valid |
|         |                        | 035946084 | 40mg/0,8ml<br>2 pens     | 11 | 2 pens of 40mg on the first day and 1<br>pen after 7 days        | 1 pen every 14 days for as long as the Therapeutic Plan is valid     |
|         |                        | 035946122 | 40mg/0,4ml<br>2 syringes | 11 | 2 syringes of 40mg on the first day and 1<br>syringe after 7 day | 1 syringe every 14 days for as long as the Therapeutic Plan is valid |
|         |                        | 035946161 | 40mg/0,4ml<br>2 pens     | 11 | 2 pens of 40mg on the first day and 1<br>pen after 7 days        | 1 pen every 14 days for as long as the Therapeutic Plan is valid     |
|         | Adalimumab Biosimilare | 045317031 | 40mg/0,8ml<br>2 syringes | 11 | 2 syringes of 40mg on the first day and 1<br>syringe after 7 day | 1 syringe every 14 days for as long as the Therapeutic Plan is valid |
|         |                        | 046889022 | 40mg/0,8ml<br>2 pens     | 11 | 2 pens of 40mg on the first day and 1<br>pen after 7 days        | 1 pen every 14 days for as long as the Therapeutic Plan is valid     |
|         |                        | 047805027 | 40mg/0,8ml<br>2 syringes | 11 | 2 syringes of 40mg on the first day and 1<br>syringe after 7 day | 1 syringe every 14 days for as long as the Therapeutic Plan is valid |
|         |                        | 045616024 | 40mg/0,8ml<br>2 syringes | 11 | 2 syringes of 40mg on the first day and 1<br>syringe after 7 day | 1 syringe every 14 days for as long as the Therapeutic Plan is valid |
| L04AB05 | Certolizumab           | 039539010 | 200mg/ml<br>2 syringes   | 14 | 2 syringes every 14 days for 42 days                             | 1 syringe every 14 days for as long as the Therapeutic Plan lasts    |
|         |                        | 039539059 | 200mg/ml 2 pens          | 14 | 2 pens every 14 days for 42 days                                 | 1 syringe every 14 days for as long as the Therapeutic Plan lasts    |
| L04AC05 | Ustekinumab*           | 038936023 | 90mg/ml<br>1 vial        | 28 | 1 injection every 28 days for 56 days                            | 1 injection every 84 days for as long as the Therapeutic Plan lasts  |
|         |                        | 038936011 | 45mg/0,5ml<br>1 vial     | 28 | 1 injection every 28 days for 56 days                            | 1 injection every 84 days for as long as the Therapeutic Plan lasts  |
|         |                        | 038936035 | 45mg/0,5ml<br>1 syringe  | 28 | 1 syringe every 28 days for 56 days                              | 1 syringe every 84 days for as long as the Therapeutic Plan lasts    |
|         |                        | 038936047 | 90mg/ml<br>1 syringe     | 28 | 1 syringe every 28 days for 56 days                              | 1 syringe every 84 days for as long as the Therapeutic Plan lasts    |
|         |                        |           |                          |    |                                                                  |                                                                      |

|                |                      |           |                        |           |                                                                     |                                                                    |
|----------------|----------------------|-----------|------------------------|-----------|---------------------------------------------------------------------|--------------------------------------------------------------------|
| <b>L04AC10</b> | <b>Secukinumab</b>   | 043873025 | 150mg/ml<br>1 syringe  | <b>4</b>  | 2 syringes every 7 days for 35 days                                 | 2 syringes every 28 days for as long as the Therapeutic Plan lasts |
|                |                      | 043873102 | 300mg/2ml<br>1 pen     | <b>7</b>  | 1 pens every 7 days for 35 days                                     | 1 pen every 28 days for as long as the Therapeutic Plan lasts      |
|                |                      | 043873037 | 150mg/ml<br>2 syringes | <b>7</b>  | 2 syringes every 7 days for 35 days                                 | 2 syringes every 28 days for as long as the Therapeutic Plan lasts |
|                |                      | 043873049 | 150mg/ml 1 pen         | <b>4</b>  | 2 pens every 7 days for 35 days                                     | 2 pens every 28 days for as long as the Therapeutic Plan lasts     |
|                |                      | 043873052 | 150mg/ml<br>2 pens     | <b>7</b>  | 2 pens every 7 days for 35 days                                     | 2 pens every 28 days for as long as the Therapeutic Plan lasts     |
| <b>L04AC12</b> | <b>Brodalumab</b>    | 045484019 | 210mg<br>2 syringes    | <b>18</b> | 1 syringe every 7 days for 21 days                                  | 1 syringe every 14 days for as long as the Therapeutic Plan lasts  |
| <b>L04AC13</b> | <b>Ixekizumab</b>    | 044863025 | 80mg/ml<br>2 syringes  | <b>25</b> | 2 syringes every 14 days and 1 syringe<br>every 14 days for 84 days | 1 syringe every 28 days for as long as the Therapeutic Plan lasts  |
|                |                      | 044863052 | 80mg/ml<br>2 syringes  | <b>25</b> | 2 syringes every 14 days and 1 syringe<br>every 14 days for 84 days | 1 syringe every 28 days for as long as the Therapeutic Plan lasts  |
|                |                      | 044863013 | 80mg/ml<br>1 pen       | <b>13</b> | 2 pens every 14 days and 1 syringe every<br>14 days for 84 days     | 1 pen every 28 days for as long as the Therapeutic Plan lasts      |
| <b>L04AC16</b> | <b>Guselkumab</b>    | 045772011 | 100mg/l<br>1 syringe   | <b>28</b> | 1 syringe every 28 days for 56 days                                 | 1 syringe every 56 days for as long as the Therapeutic Plan lasts  |
| <b>L04AC17</b> | <b>Tildrakizumab</b> | 047196011 | 100mg/ml<br>1 syringe  | <b>28</b> | 1 syringe every 28 days for 56 days                                 | 1 syringe every 84 days for as long as the Therapeutic Plan lasts  |
| <b>L04AC18</b> | <b>Risankizumab</b>  | 047821018 | 75mg/0,83ml 2 syringes | <b>28</b> | 2 syringes every 28 days for 56 days                                | 2 syringes every 84 days for as long as the Therapeutic Plan lasts |

\* ustekinumab 45 mg if body weight is between 60 kg and 100 kg, ustekinumab 90 mg if weight > 100

Table S3. Switch and Swap therapy among drug classes for PSO treatment

|                    |               | Anti- PDE4 | Anti TNF- $\alpha$ |            |            |              | Anti IL-12/23 | Anti IL-17  |            |            | Anti IL-23 |               |              |
|--------------------|---------------|------------|--------------------|------------|------------|--------------|---------------|-------------|------------|------------|------------|---------------|--------------|
|                    |               | Apremilast | Etanercept         | Infliximab | Adalimumab | Certolizumab | Ustekinumab   | Secukinumab | Brodalumab | Ixekizumab | Guselkumab | Tildrakizumab | Risankizumab |
| Anti- PDE4         | Apremilast    |            | Swap               | Swap       | Swap       | Swap         | Swap          | Swap        | Swap       | Swap       | Swap       | Swap          | Swap         |
| Anti TNF- $\alpha$ | Etanercept    | Swap       |                    | Switch     | Switch     | Switch       | Swap          | Swap        | Swap       | Swap       | Swap       | Swap          | Swap         |
|                    | Infliximab    | Swap       | Switch             |            | Switch     | Switch       | Swap          | Swap        | Swap       | Swap       | Swap       | Swap          | Swap         |
|                    | Adalimumab    | Swap       | Switch             | Switch     |            | Switch       | Swap          | Swap        | Swap       | Swap       | Swap       | Swap          | Swap         |
|                    | Certolizumab  | Swap       | Switch             | Switch     | Switch     |              | Swap          | Swap        | Swap       | Swap       | Swap       | Swap          | Swap         |
| Anti IL-12/23      | Ustekinumab   | Swap       | Swap               | Swap       | Swap       | Swap         |               | Swap        | Swap       | Swap       | Swap       | Swap          | Swap         |
| Anti IL-17         | Secukinumab   | Swap       | Swap               | Swap       | Swap       | Swap         | Swap          |             | Switch     | Switch     | Swap       | Swap          | Swap         |
|                    | Brodalumab    | Swap       | Swap               | Swap       | Swap       | Swap         | Swap          | Switch      |            | Switch     | Swap       | Swap          | Swap         |
|                    | Ixekizumab    | Swap       | Swap               | Swap       | Swap       | Swap         | Swap          | Switch      | Switch     |            | Swap       | Swap          | Swap         |
| Anti IL-23         | Guselkumab    | Swap       | Swap               | Swap       | Swap       | Swap         | Swap          | Swap        | Swap       | Swap       |            | Switch        | Switch       |
|                    | Tildrakizumab | Swap       | Swap               | Swap       | Swap       | Swap         | Swap          | Swap        | Swap       | Swap       | Switch     |               | Switch       |
|                    | Risankizumab  | Swap       | Swap               | Swap       | Swap       | Swap         | Swap          | Swap        | Swap       | Swap       | Switch     | Switch        |              |

| Legend    |                    |      |        |
|-----------|--------------------|------|--------|
| Indicator | Drug class         | Swap | Switch |
| ▲         | Anti- PDE4         | ▲    | ▲      |
| ▲         | Anti TNF- $\alpha$ | ▲    | ▲      |
| ▲         | Anti IL-12/23      | ▲    | ▲      |
| ▲         | Anti IL-17         | ▲    | ▲      |

**Table S4.** Pattern swaps and switches between drugs for the treatment of psoriasis

|                    |              | Overall | Anti- PDE4 | Anti TNF- $\alpha$ |            | Anti IL-12/23 | Anti IL-17  |            |            |
|--------------------|--------------|---------|------------|--------------------|------------|---------------|-------------|------------|------------|
|                    |              |         | Apremilast | Etanercept         | Adalimumab | Ustekinumab   | Secukinumab | Brodalumab | Ixekizumab |
| Anti- PDE4         | Apremilast   | 165     | 141        | 4                  | 1          | 4             | 3           | 1          | 10         |
| Anti TNF- $\alpha$ | Etanercept   | 56      | 2          | 37                 | 1          | 8             | 5           |            | 3          |
|                    | Infliximab   | 1       |            |                    |            |               |             |            |            |
|                    | Adalimumab   | 132     | 1          | 2                  | 114        | 4             | 5           |            | 5          |
|                    | Certolizumab | 9       | 1          |                    |            |               | 1           |            | 2          |
| Anti IL-12/23      | Ustekinumab  | 124     | 3          | 1                  | 3          | 109           |             |            | 7          |
| Anti IL-17         | Secukinumab  | 183     | 4          |                    | 3          | 4             | 161         |            | 5          |
|                    | Brodalumab   | 0       |            |                    |            |               |             | 0          |            |
|                    | Ixekizumab   | 141     |            | 1                  | 2          | 4             | 2           |            | 128        |

| Legend    |                    |      |        |
|-----------|--------------------|------|--------|
| Indicator | Drug class         | Swap | Switch |
| ▲         | Anti- PDE4         | ▲    | ▲      |
| ▲         | Anti TNF- $\alpha$ | ▲    | ▲      |
| ▲         | Anti IL-12/23      | ▲    | ▲      |
| ▲         | Anti IL-17         | ▲    | ▲      |

**Figure S3.** One year medication persistence rates to PSO treatments (30 days gap)

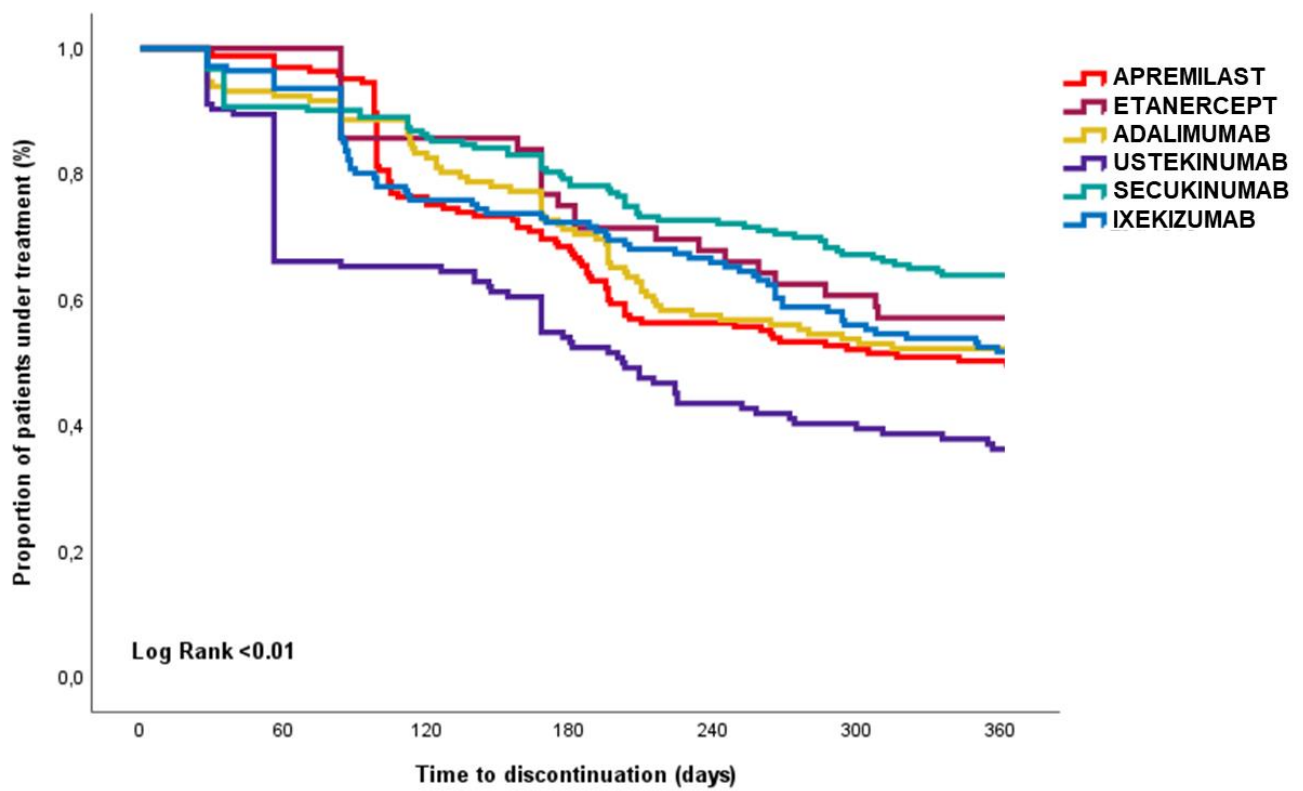

**Figure S4.** One year medication persistence rates to PSO treatments (90 days gap)

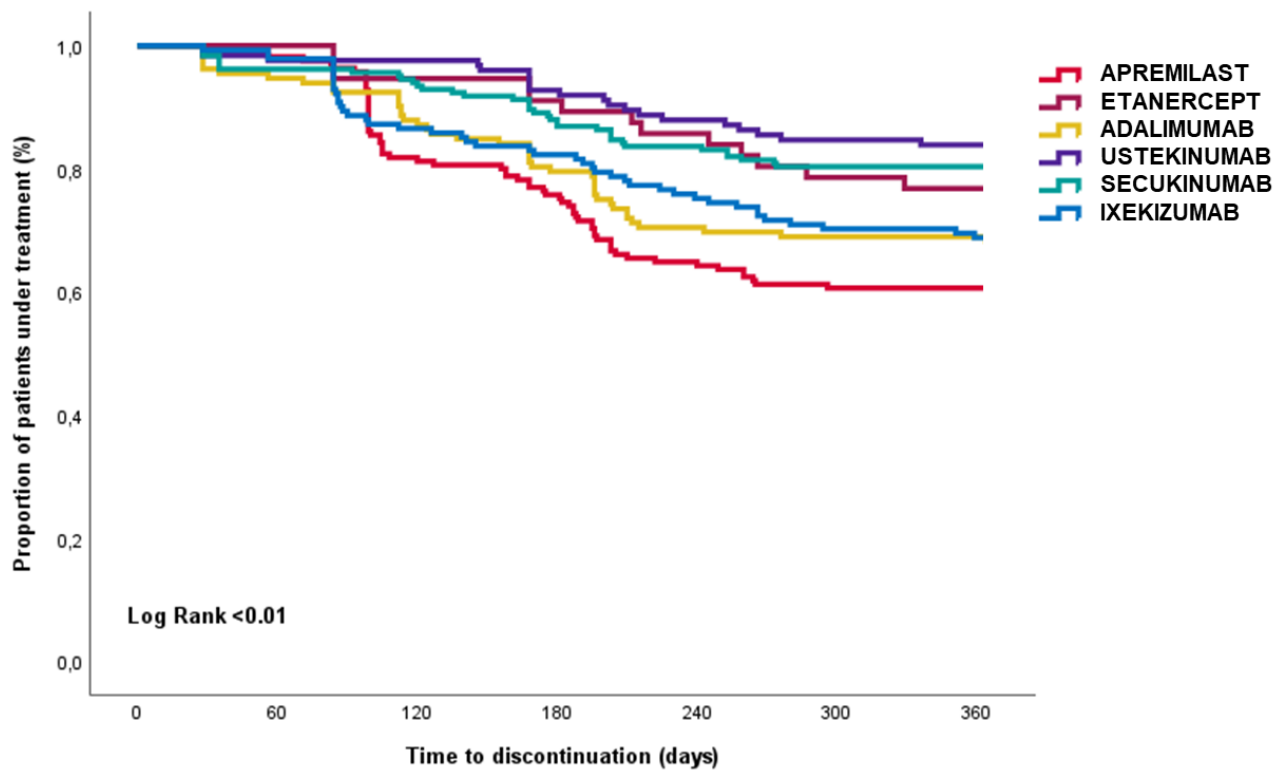

Supplement: s1 [file s1]
